# Supplementary material for: Repolarization of Tumor-Infiltrating Myeloid Cells for Augmentation of CAR T Cell Therapies
Source: PubMed Central journal article supplement (PMC8889096; doi:10.3389/fimmu.2022.816761), 2022-02-16
Supplement: DataSheet_1.pdf [file DataSheet_1.pdf]

# Supplemental Figures

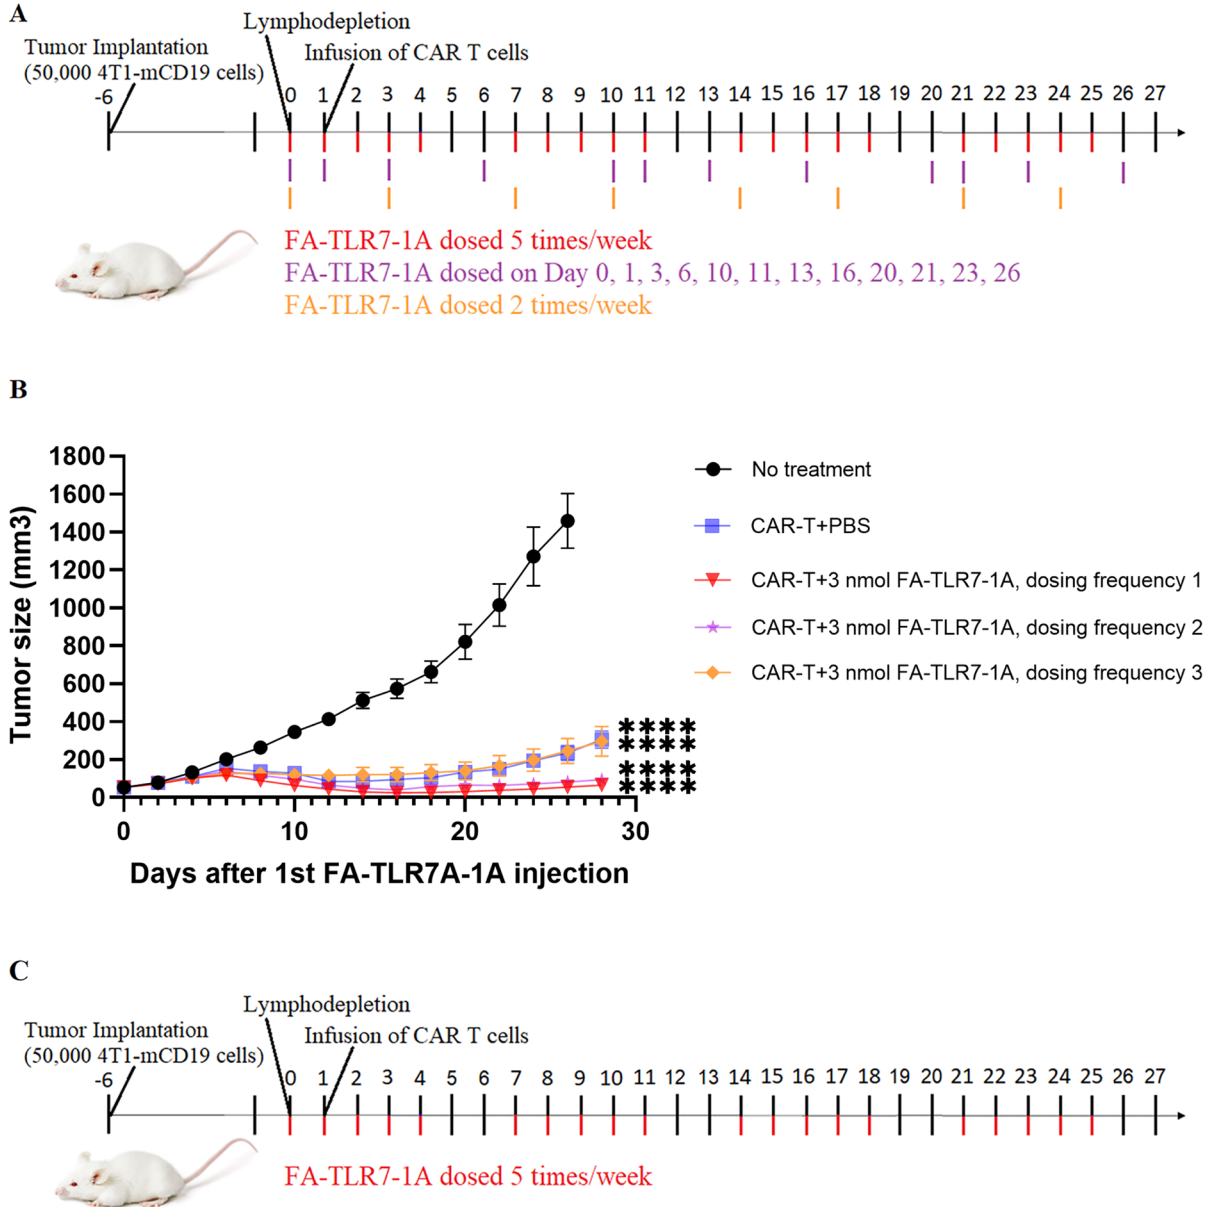

**Figure S1.**

**Evaluation of the effect of FA-TLR7-1A dosing frequency on CAR T cell efficacy.** (A) Timeline of tumor implantation, lymphodepletion, CAR T cell implantation, and treatments. (B) Analysis of the effect of different FA-TLR7-1A dosing frequencies (defined in the figure) on tumor growth. Mean  $\pm$  SEM. Statistical significance between multiple groups was determined using a 1-way ANOVA followed by a Tukey post hoc analysis. (\* $P < 0.05$ , \*\* $P < 0.01$ , \*\*\* $P < 0.001$ , \*\*\*\* $P < 0.0001$ ). (C) Timeline of tumor implantation, lymphodepletion, CAR T cell implantation, and treatments for all future studies after FA-TLR7-1A dose optimization.

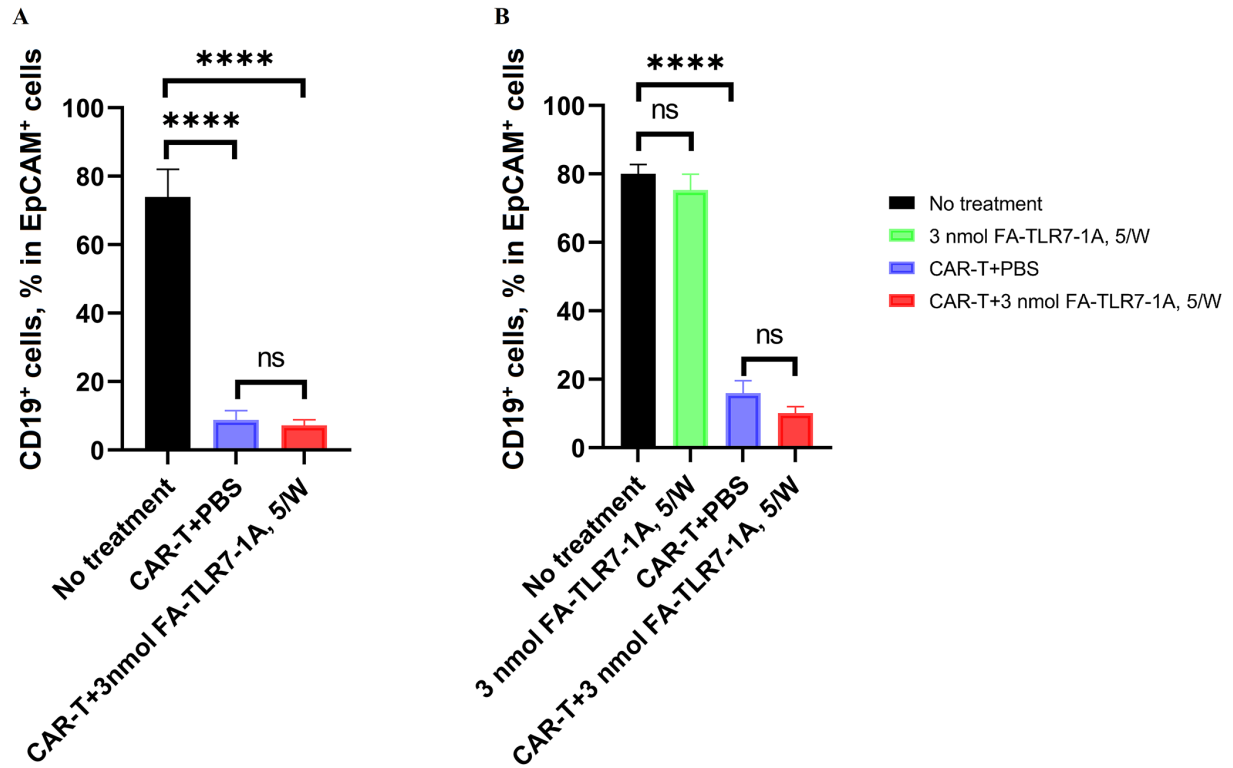

**Figure S2.**

**Loss of CD19 expression on 4T1-mCD19 cancer cells following CAR T cell treatment of solid tumors. (A)**

The percent of total EpCAM positive tumor cells that were mCD19 positive at the end of the therapy shown in Fig. 3A. **(B)** The percent of total EpCAM positive tumor cells that were mCD19 positive at the end of the therapy shown in Fig. 4. The tumors in Fig. 3A were grown from a heterogeneous mixture of CD19 positive 4T1 cells whereas the tumors in Fig. 4 were grown from a single cell clone of CD19 positive 4T1 cells. Mean  $\pm$  SEM. Statistical significance between multiple groups was determined using a 1-way ANOVA followed by a Tukey post hoc analysis. (\*P < 0.05, \*\*P < 0.01, \*\*\*P < 0.001, \*\*\*\*P < 0.0001).

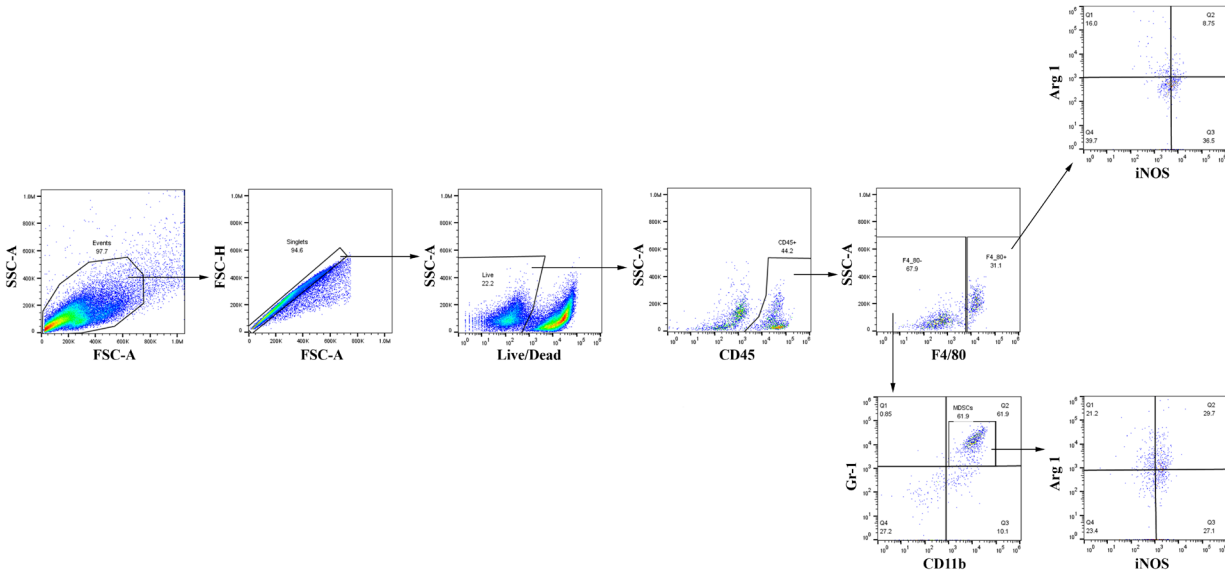

**Figure S3.**

**Flow cytometry gating strategy. Representative flow cytometry plots from tumor digested cells showing the gating scheme for macrophages and MDSCs.** Total tumor cell singlets were first gated by forward versus side scatter (FSC-A)/SSC-A), after which aggregates were excluded by FSC-A vs. FSC-H. Next, live cells were selected with Zombie Violet and immune cells were gated with CD45 positive staining. These were then further gated for the subsets of interest, namely, F4/80<sup>+</sup> cells (macrophages) and F4/80<sup>-</sup> CD11b<sup>+</sup> Gr1<sup>+</sup> (MDSCs). Macrophages were further divided into iNOS<sup>+</sup> Arg 1<sup>-</sup> – M1 macrophages, and iNOS<sup>-</sup> Arg 1<sup>+</sup> – M2 macrophages.

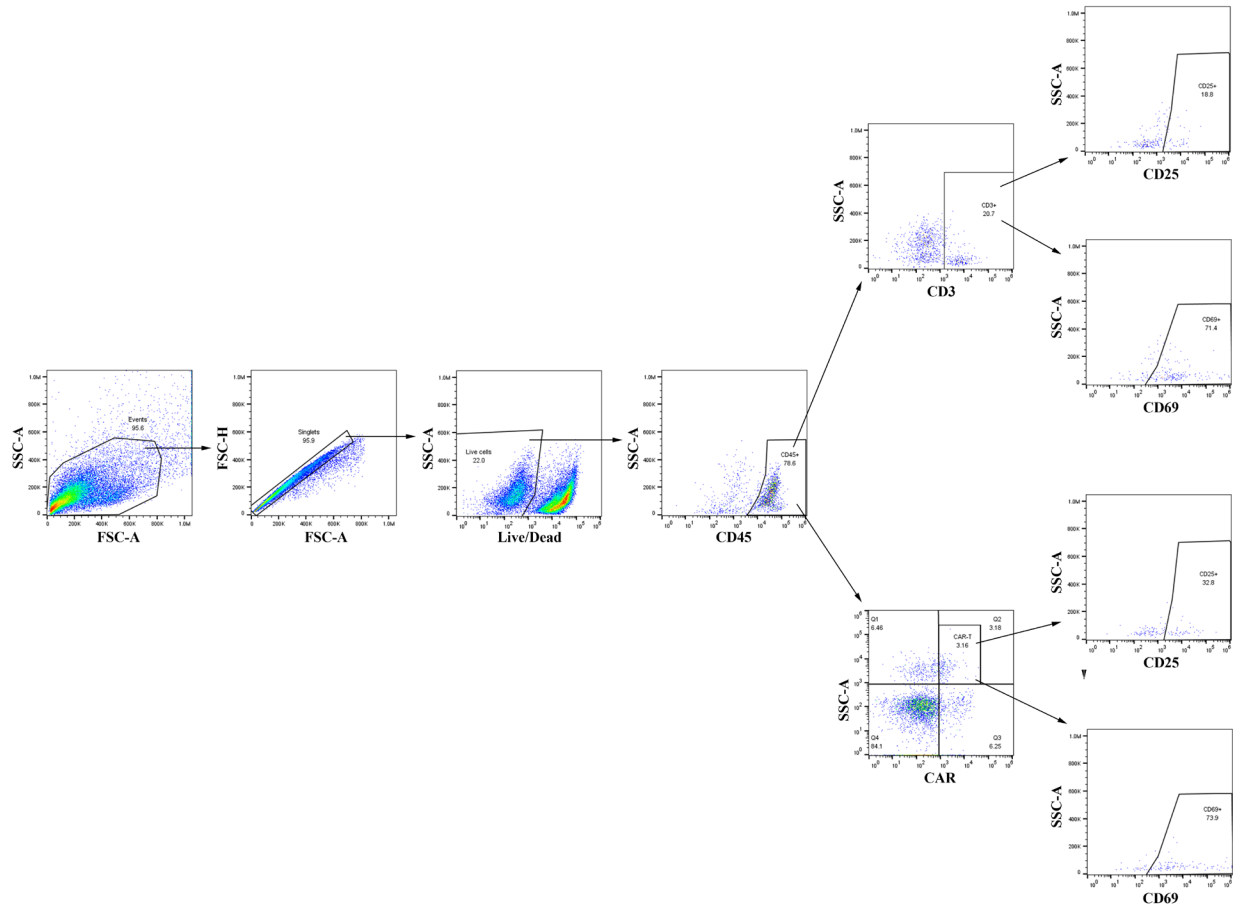

**Figure S4.**  
**Flow cytometry gating strategy. Representative flow cytometry plots from tumor digested cells showing the gating scheme for total T cells and CAR T cells.** Analysis was performed as in Fig. S3 except CD45 positive cells were further gated for the subsets of interest, namely, CD3<sup>+</sup> – total T cells, and CD3<sup>+</sup> CAR<sup>+</sup> – CAR T cells. Each subset was further gated on CD25<sup>+</sup> or CD69<sup>+</sup> for the activated sub-populations.

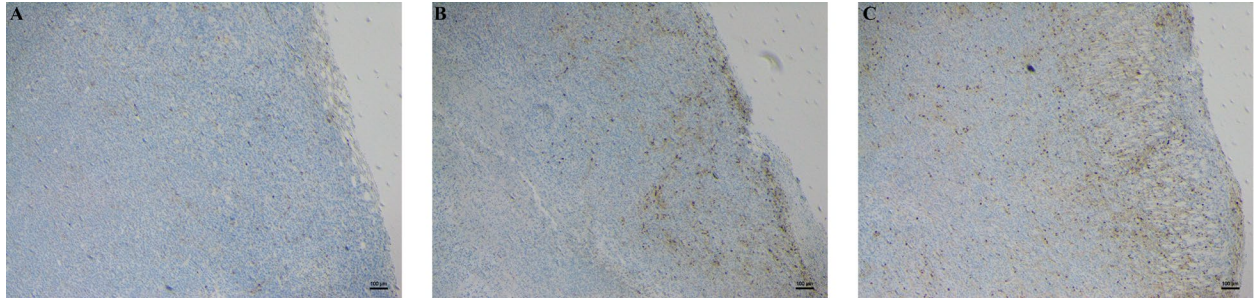

**Figure S5.**

**IHC staining of mouse CD3 in 4T1-mCD19 tumors (4x). (A) No treatment; (B) CAR-T+PBS; (C). CAR-T + 3nmol FA-TLR7-1A, 5/W.**

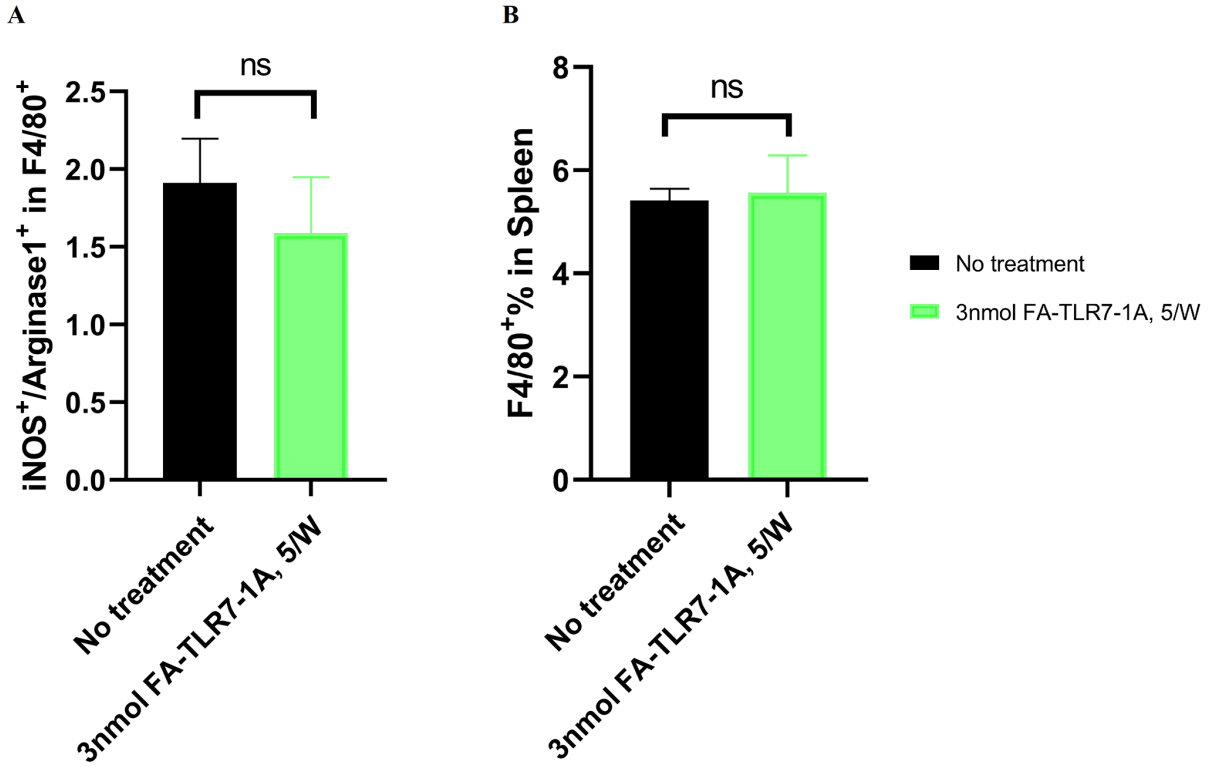

**Figure S6.**  
**Examination of the effect of FA-TLR7-1A on the splenic macrophages from the mice treated in Fig. 4.**  
 The M1:M2 ratio and the percentage of macrophages in the spleen after FA-TLR7-1A treatment were analyzed by flow cytometry as described in Fig. 5. Mean  $\pm$  SEM. Statistical significance between groups was determined using an unpaired two-tailed t-test (\*P < 0.05).
